# Supplementary material
Source: PubMed Central journal article supplement (PMC5899199)
Supplement: JVI.01756-17_zjv009183484s1.pdf [file JVI.01756-17_zjv009183484s1.pdf]

**Table S1. *Fusarium graminearum* strains used in this study.**

| Strain                       | Description                                                                                            | References        |
|------------------------------|--------------------------------------------------------------------------------------------------------|-------------------|
| WT-VF                        | Wild-type <i>F. graminearum</i> (lineage 7) PH-1                                                       | Lee et al. (2014) |
| FgV1/PH-1                    | Wild-type PH-1 infected with FgV1                                                                      | Lee et al. (2014) |
| FgV2/PH-1                    | Wild-type PH-1 infected with FgV2                                                                      | Lee et al. (2014) |
| FgV3/PH-1                    | Wild-type PH-1 infected with FgV3                                                                      | Lee et al. (2014) |
| $\Delta FgDICER-1$           | <i>FgDICER-1</i> (FGSG_09025) gene deletion mutant in WT-VF genetic background                         | This study        |
| $\Delta FgDICER-2$           | <i>FgDICER-2</i> (FGSG_04408) gene deletion mutant in WT-VF genetic background                         | This study        |
| $\Delta FgDICER-1/FgDICER-2$ | <i>FgDICER-1</i> and <i>FgDICER-2</i> double gene deletion mutant in WT-VF genetic background          | This study        |
| $\Delta FgAGO-1$             | <i>FgAGO-1</i> (FGSG_08752) gene deletion mutant in WT-VF genetic background                           | This study        |
| $\Delta FgAGO-2$             | <i>FgAGO-2</i> (FGSG_00348) gene deletion mutant in WT-VF genetic background                           | This study        |
| $\Delta FgAGO-1/FgAGO-2$     | <i>FgAGO-1</i> and <i>FgAGO-2</i> double gene deletion mutant in WT-VF genetic background              | This study        |
| $\Delta FgDICER-1/FgAGO-1$   | <i>FgDICER-1</i> and <i>FgAGO-1</i> double gene deletion mutant in $\Delta FgAGO-1$ genetic background | This study        |
| $\Delta FgDICER-2/FgAGO-1$   | <i>FgDICER-2</i> and <i>FgAGO-1</i> double gene deletion mutant in $\Delta FgAGO-1$ genetic background | This study        |
| $\Delta FgDICER-1/FgAGO-2$   | <i>FgDICER-1</i> and <i>FgAGO-2</i> double gene deletion mutant in $\Delta FgAGO-2$ genetic background | This study        |
| $\Delta FgDICER-2/FgAGO-2$   | <i>FgDICER-2</i> and <i>FgAGO-2</i> double gene deletion mutant in $\Delta FgAGO-2$ genetic background | This study        |
| $\Delta FgRdRP-1$            | <i>FgRdRP-1</i> (FGSG_06504) gene deletion mutant in WT-VF genetic background                          | This study        |
| $\Delta FgRdRP-4$            | <i>FgRdRP-4</i> (FGSG_04619) gene deletion mutant in WT-VF genetic background                          | This study        |
| <i>FgAGO-1</i> _OE           | <i>FgAGO-1</i> (FGSG_08752) gene over-expression mutant in WT-VF genetic background                    | This study        |
| <i>FgAGO-2</i> _OE           | <i>FgAGO-2</i> (FGSG_00348) gene over-expression mutant in WT-VF genetic background                    | This study        |
| <i>FgDICER-1</i> _OE         | <i>FgDICER-1</i> (FGSG_09025) gene over-expression mutant in WT-VF genetic background                  | This study        |
| <i>FgDICER-2</i> _OE         | <i>FgDICER-2</i> (FGSG_04408) gene over-expression mutant in WT-VF genetic background                  | This study        |
| <i>FgRdRP-1</i> _OE          | <i>FgRdRP-1</i> (FGSG_06504) gene over-expression mutant in WT-VF genetic background                   | This study        |
| <i>FgRdRP-4</i> _OE          | <i>FgRdRP-4</i> (FGSG_04619) gene over-expression mutant in WT-VF genetic background                   | This study        |
| <i>FgAGO-1</i> C             | <i>FgAGO-1</i> gene complement mutant in $\Delta FgAGO-1$ -VF genetic background                       | This study        |
| <i>FgAGO-2</i> C             | <i>FgAGO-2</i> gene complement mutant in $\Delta FgAGO-2$ -VF genetic background                       | This study        |
| <i>FgDICER-1</i> C           | <i>FgDICER-1</i> gene complement mutant in $\Delta FgDICER-1$ -VF genetic background                   | This study        |
| <i>FgDICER-2</i> C           | <i>FgDICER-2</i> gene complement mutant in $\Delta FgDICER-2$ -VF genetic background                   | This study        |
| <i>FgRdRP-1</i> C            | <i>FgRdRp-1</i> gene complement mutant in $\Delta FgRdRP-1$ -VF genetic background                     | This study        |
| <i>FgRdRP-4</i> C            | <i>FgRdRp-4</i> gene complement mutant in $\Delta FgRdRP-4$ -VF genetic background                     | This study        |
| GFP                          | GFP over-expression mutant that contained pSKGen in <i>F. graminearum</i> PH-1 strain                  | This study        |
| SA                           | hairpin structure expression mutant in <i>F. graminearum</i> PH-1 strain                               | This study        |
| GFP+SA                       | GFP over-expression mutant and hairpin structure expression mutant                                     | This study        |

1. Lee K-M, Cho WK, Yu J, Son M, Choi H, Min K, Lee Y-W, Kim K-H. 2014. A comparison of transcriptional patterns and mycological phenotypes following infection of *Fusarium graminearum* by four mycoviruses. PLOS One 9:e100989.
